# Supplementary material for: Specific alterations in plasma proteins during depressed, manic, and euthymic states of bipolar disorder
Source: PubMed Central journal article supplement (PMC4671523; doi:10.1590/1414-431x20154550), 2015-09-08
Supplement: 1414-431X-bjmbr-48-11-00973-supp4550.pdf [file 1414-431X-bjmbr-48-11-00973-supp4550.pdf]

**Table S1.** Differentially expressed proteins in bipolar disorders (BD) identified by two-dimensional electrophoresis. The 5 proteins selected for Western blot validation are underlined. Spots were considered to be altered in specific groups if proteins were up-regulated or down-regulated 1.5-fold (less than 0.67 compared to controls) in only one BD state. Spots were altered across all BD groups if proteins were altered 1.5-fold across all three BD states. PI: isoelectric point; MW: molecular weight.

| Spot                                      | IPI No.     | PI   | MW (Da)  | Depressed BD expression ratio (compared to control) | Manic BD expression ratio (compared to control) | Euthymic BD expression ratio (compared to control) | Healthy control expression ratio | Protein                                       |
|-------------------------------------------|-------------|------|----------|-----------------------------------------------------|-------------------------------------------------|----------------------------------------------------|----------------------------------|-----------------------------------------------|
| <b>Altered across all BD groups</b>       |             |      |          |                                                     |                                                 |                                                    |                                  |                                               |
| 1                                         | IPI00021841 | 5.56 | 30758.9  | 0.37                                                | 0.42                                            | 0.61                                               | 1                                | <u>Apolipoprotein A1</u>                      |
| 2                                         | IPI00478493 | 6.13 | 38940.5  | 4.29                                                | 2.56                                            | 2.48                                               | 1                                | HP protein                                    |
| 3                                         | IPI00914948 | 5.58 | 42189.0  | 2.12                                                | 2.43                                            | 1.95                                               | 1                                | <u>Apolipoprotein L1</u>                      |
| 4                                         | IPI00019943 | 5.64 | 70962.7  | 2.11                                                | 1.82                                            | 2.20                                               | 1                                | Afamin                                        |
| 5                                         | IPI00006114 | 5.97 | 46454.4  | 3.77                                                | 2.53                                            | 2.50                                               | 1                                | Pigment epithelium-derived factor             |
| 6                                         | IPI00418163 | 6.89 | 194170.1 | 4.12                                                | 2.70                                            | 3.19                                               | 1                                | C4B1                                          |
| 7                                         | IPI00968182 | 5.36 | 39969.3  | 2.49                                                | 3.51                                            | 0.04                                               | 1                                | Vitamin D-binding protein                     |
| 8                                         | IPI00643525 | 6.65 | 194218.1 | 4.01                                                | 1.91                                            | 3.76                                               | 1                                | C4A3                                          |
| 9                                         | IPI00329775 | 7.61 | 48963.7  | 2.12                                                | 1.77                                            | 2.27                                               | 1                                | Carboxypeptidase B2                           |
| 10                                        | IPI00022463 | 6.81 | 79294.5  | 2.68                                                | 4.22                                            | 3.19                                               | 1                                | Serotransferrin                               |
| 11                                        | IPI00010295 | 6.86 | 52538.4  | 0.39                                                | 0.57                                            | 0.61                                               | 1                                | Carboxypeptidase N catalytic chain            |
| 12                                        | IPI00163207 | 7.25 | 62748.1  | 0.25                                                | 0.35                                            | 0.44                                               | 1                                | N-acetylmuramoyl-L-alanine amidase            |
| 13                                        | IPI01014157 | 6.31 | 101781.8 | 0.28                                                | 0.55                                            | 0.40                                               | 1                                | Inter-alpha-trypsin inhibitor heavy chain H1  |
| 14                                        | IPI00965713 | 8.22 | 50436.4  | 1.54                                                | 3.46                                            | 3.12                                               | 1                                | Fibrinogen beta chain                         |
| 15                                        | IPI00022391 | 6.10 | 25485.2  | 1.80                                                | 0.04                                            | 0.65                                               | 1                                | <u>Serum amyloid P-component</u>              |
| 16                                        | IPI01018048 | 5.72 | 76971.4  | 0.62                                                | 0.53                                            | 0.57                                               | 1                                | inter-alpha-trypsin 1inhibitor heavy chain H4 |
| <b>Altered only in depressed BD group</b> |             |      |          |                                                     |                                                 |                                                    |                                  |                                               |
| 17                                        | IPI00021891 | 5.37 | 52106.1  | 2.21                                                | 1.42                                            | 1.16                                               | 1                                | Fibrinogen gamma chain                        |
| 18                                        | IPI00783987 | 6.02 | 188569.5 | 2.17                                                | 1.28                                            | 0.83                                               | 1                                | Complement C3                                 |
| 19                                        | IPI00025204 | 5.28 | 39602.5  | 0.54                                                | 0.93                                            | 1.16                                               | 1                                | CD5L(IgM-associated peptide)                  |
| 20                                        | IPI01015184 | 6.45 | 29068.1  | 1.76                                                | 1.37                                            | 0.92                                               | 1                                | Hemopexin                                     |
| 21                                        | IPI00021727 | 7.15 | 69042.2  | 0.63                                                | 0.83                                            | 1.05                                               | 1                                | C4b-binding protein alpha chain               |
| 22                                        | IPI00220327 | 8.15 | 66170.1  | 1.57                                                | 1.21                                            | 1.00                                               | 1                                | Keratin, type II cytoskeletal 1               |
| 23                                        | IPI00215983 | 7.14 | 28870.2  | 0.51                                                | 0.69                                            | 0.79                                               | 1                                | <u>Carbonic anhydrase 1</u>                   |
| <b>Altered only in manic BD group</b>     |             |      |          |                                                     |                                                 |                                                    |                                  |                                               |
| 24                                        | IPI00478003 | 6.03 | 164613.4 | 1.16                                                | 0.19                                            | 0.80                                               | 1                                | <u>Alpha-2-macroglobulin (A2M)</u>            |
| 25                                        | IPI00011264 | 7.38 | 38766.4  | 1.16                                                | 0.19                                            | 0.80                                               | 1                                | Complement factor H-related protein 1         |
| 26                                        | IPI00296165 | 5.82 | 81606.4  | 0.81                                                | 0.31                                            | 1.25                                               | 1                                | Complement C1r subcomponent                   |
| 27                                        | IPI00029717 | 8.23 | 70227.0  | 0.72                                                | 0.55                                            | 0.71                                               | 1                                | Fibrinogen alpha chain                        |
| 28                                        | IPI00019359 | 5.14 | 62254.9  | 1.10                                                | 1.64                                            | 1.34                                               | 1                                | Keratin, type I cytoskeletal 9                |
| 29                                        | IPI00022394 | 8.61 | 25985.2  | 0.76                                                | 1.66                                            | 0.88                                               | 1                                | Complement C1q subcomponent subunit C         |
| <b>Altered only in euthymic BD group</b>  |             |      |          |                                                     |                                                 |                                                    |                                  |                                               |
| 30                                        | IPI00796990 | 7.86 | 68976.0  | 1.03                                                | 1.01                                            | 1.71                                               | 1                                | Complement factor I heavy chain               |
| 31                                        | IPI00004373 | 5.39 | 26526.2  | 1.20                                                | 0.81                                            | 2.79                                               | 1                                | Mannose-binding protein C                     |
| 32                                        | IPI01021088 | 6.70 | 189185.5 | 1.47                                                | 0.86                                            | 1.63                                               | 1                                | Complement C4 gamma chain                     |
